# Supplementary material for: Education, Smoking and CRP Genetics in Relation to C-Reactive Protein Concentrations in Black South Africans
Source: PubMed Central journal article supplement (PMC7558133; doi:10.3390/ijerph17186646), 2020-09-11
Supplement: ijerph-17-06646-s001.pdf [file ijerph-17-06646-s001.pdf]

Supplemental Table 1: CRP SNPs, their minor allele frequencies.

| rs number<br>(SNP<br>location)        | SNP pseudonyms                                                                                                  | Genotype count<br>(genotype<br>frequency %)    |              | 95% CI of<br>genotype<br>frequency (%) | MAF (%) [1000<br>Genomes Project<br>MAF% for Africans<br>/ Europeans] | HW<br>p-value |
|---------------------------------------|-----------------------------------------------------------------------------------------------------------------|------------------------------------------------|--------------|----------------------------------------|-----------------------------------------------------------------------|---------------|
| rs7553007 <sup>ϕ</sup><br>(159728759) | Promotor                                                                                                        | GG                                             | 923 (57.90)  | 55.4 – 60.3                            | A = 23.8<br>[19.8 / 30.9]                                             | 0.05          |
|                                       |                                                                                                                 | GA                                             | 583 (36.57)  | 34.2 – 39.0                            |                                                                       |               |
|                                       |                                                                                                                 | AA                                             | 88 (5.52)    | 4.43 – 6.70                            |                                                                       |               |
| rs1341665 <sup>ϕ</sup><br>(159721769) | -7180C>T<br>Promotor                                                                                            | GG                                             | 931 (58.44)  | 55.9 – 60.8                            | A = 23.5<br>[19.0 / 31.6]                                             | 0.53          |
|                                       |                                                                                                                 | GA                                             | 577 (36.22)  | 33.9 – 38.6                            |                                                                       |               |
|                                       |                                                                                                                 | AA                                             | 85 (5.34)    | 4.27 – 6.49                            |                                                                       |               |
| rs2027471 <sup>ϕ</sup><br>(159719598) | Promotor                                                                                                        | TT                                             | 932 (58.47)  | 55.9 – 60.8                            | A = 23.5<br>[18.8 / 31.7]                                             | 0.73          |
|                                       |                                                                                                                 | TA                                             | 577 (36.20)  | 33.9 – 38.6                            |                                                                       |               |
|                                       |                                                                                                                 | AA                                             | 85 (5.33)    | 4.26 – 6.49                            |                                                                       |               |
| rs3093058 <sup>§</sup><br>(159715525) | -790A>T<br>Promotor (conserved region<br>predicted to alter a<br>transcription factor E box<br>binding element) | AA                                             | 1101 (69.25) | 67.1 – 71.6                            | A = 19.4 [18.4 / 0.0]                                                 | 0.84          |
|                                       |                                                                                                                 | AT                                             | 458 (28.81)  | 26.5 – 31.0                            |                                                                       |               |
|                                       |                                                                                                                 | TT                                             | 31 (1.95)    | 1.23 – 2.58                            |                                                                       |               |
| rs3093062 <sup>§</sup><br>(159714894) | -409G>A<br>Promotor                                                                                             | GG<br>(CC)<br>GA<br>(CT)<br>AA<br>(TT)         | 1102 (69.26) | 67.1 – 71.7                            | T = 16.4 [18.5 / 0.0]                                                 | 0.76          |
|                                       |                                                                                                                 |                                                | 458 (28.79)  | 26.5 – 30.9                            |                                                                       |               |
|                                       |                                                                                                                 |                                                | 31 (1.95)    | 1.23 – 2.58                            |                                                                       |               |
| rs1417938<br>(159714396)              | IVS1+29A>T, i178T>A;<br>1919A>T<br>intron (position + 29) close to<br>splice site junction                      | AA                                             | 1509 (95.03) | 94.0 – 96.2                            | A = 2.49 [8.50 / 32.6]                                                | 0.27          |
|                                       |                                                                                                                 | TA                                             | 79 (4.97)    | 3.82 – 5.96                            |                                                                       |               |
| rs1800947<br>(159713648)              | Leu184Leu (L184L) or<br>silent/synonymous mutation<br>or +1059C>G; 2667G>C<br>Exon 2                            | CC                                             | 1587 (99.56) | 99.2 – 99.9                            | G = 0.22 [0.20 / 0.51]                                                | 0.62          |
|                                       |                                                                                                                 | CG                                             | 7 (0.44)     | 0.12 – 0.77                            |                                                                       |               |
| rs1130864<br>(159713301)              | 3u1273C>T or +1444G>A or<br>3014G>A<br>3' UTR                                                                   | CC<br>(GG)<br>CT<br>(GA<br>)<br>TT<br>(AA<br>) | 1189 (74.59) | 72.4 – 76.7                            | A = 13.4 [13.2 / 32.7]                                                | 0.05          |
|                                       |                                                                                                                 |                                                | 382 (23.96)  | 21.9 – 26.1                            |                                                                       |               |
|                                       |                                                                                                                 |                                                | 23 (1.44)    | 0.86 – 2.05                            |                                                                       |               |
| rs1205 <sup>ϕ</sup><br>(159712443)    | 3u2131C>T or 3872A>G/C>T<br>or +1846G>A<br>Distal 3' UTR ('3 flanking<br>region) in the MLT1K repeat            | CC                                             | 945 (59.32)  | 56.9 – 61.7                            | T = 22.8 [17.0 / 31.0]                                                | 0.73          |
|                                       |                                                                                                                 | CT                                             | 570 (35.78)  | 33.4 – 38.2                            |                                                                       |               |
|                                       |                                                                                                                 | TT                                             | 78 (4.90)    | 3.81 – 5.94                            |                                                                       |               |
| rs3093068<br>(159711574)              | +2911C>G; 4741G>C<br>3' UTR                                                                                     | GG                                             | 610 (38.32)  | 35.9 – 40.7                            | C = 37.5 [29.9 / 7.10]                                                | 0.29          |
|                                       |                                                                                                                 | GC                                             | 769 (48.30)  | 46.1 – 51.0                            |                                                                       |               |
|                                       |                                                                                                                 | CC                                             | 213 (13.38)  | 11.5 – 14.8                            |                                                                       |               |
| rs2808630<br>(159711078)              | +5237A>G<br>3' UTR                                                                                              | TT                                             | 1173 (73.59) | 71.4 – 75.7                            | C = 14.3 [14.8 / 28.4]                                                | 0.73          |
|                                       |                                                                                                                 | TC                                             | 387 (24.28)  | 22.2 – 26.4                            |                                                                       |               |
|                                       |                                                                                                                 | CC                                             | 34 (2.13)    | 1.43 – 2.87                            |                                                                       |               |
| rs2794520 <sup>ϕ</sup><br>(159709026) | 3' UTR                                                                                                          | CC                                             | 923(58.27)   | 55.8 – 60.7                            | T = 23.6 [18.3 / 31.1]                                                | 1.00          |
|                                       |                                                                                                                 | CT                                             | 574 (36.24)  | 33.9 – 38.7                            |                                                                       |               |
|                                       |                                                                                                                 | TT                                             | 87 (5.49)    | 4.34 – 6.60                            |                                                                       |               |

Several SNP aliases are the complement alleles of those given on Ensembl or published elsewhere. At rs3093058 we report our raw BeadXpress data even though it differs from that of Ensembl and previously reported by our group. Major/minor allele frequency is based Homo Sapiens GRCh38.p5.
